# Supplementary material for: The Power of Malaria Vaccine Trials Using Controlled Human Malaria Infection
Source: PubMed Central journal article supplement (PMC5230743; doi:10.1371/journal.pcbi.1005255), 2017-01-12

Probability of positive blood smear (%)

1.00  
0.75  
0.50  
0.25  
0.00

$10^1$   $10^2$   $10^3$   $10^4$   $10^5$

Parasites per mL + 1

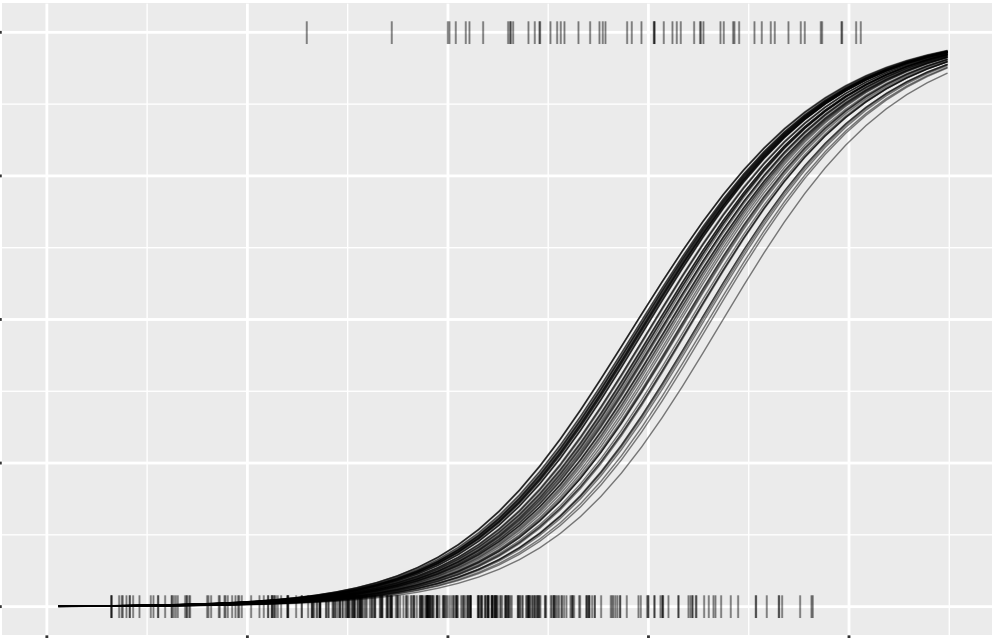

Supplement: pcbi.1005255.s003.pdf [file pcbi.1005255.s003.pdf]
