# Supplementary material for: The Power of Malaria Vaccine Trials Using Controlled Human Malaria Infection
Source: PubMed Central journal article supplement (PMC5230743; doi:10.1371/journal.pcbi.1005255), 2017-01-12

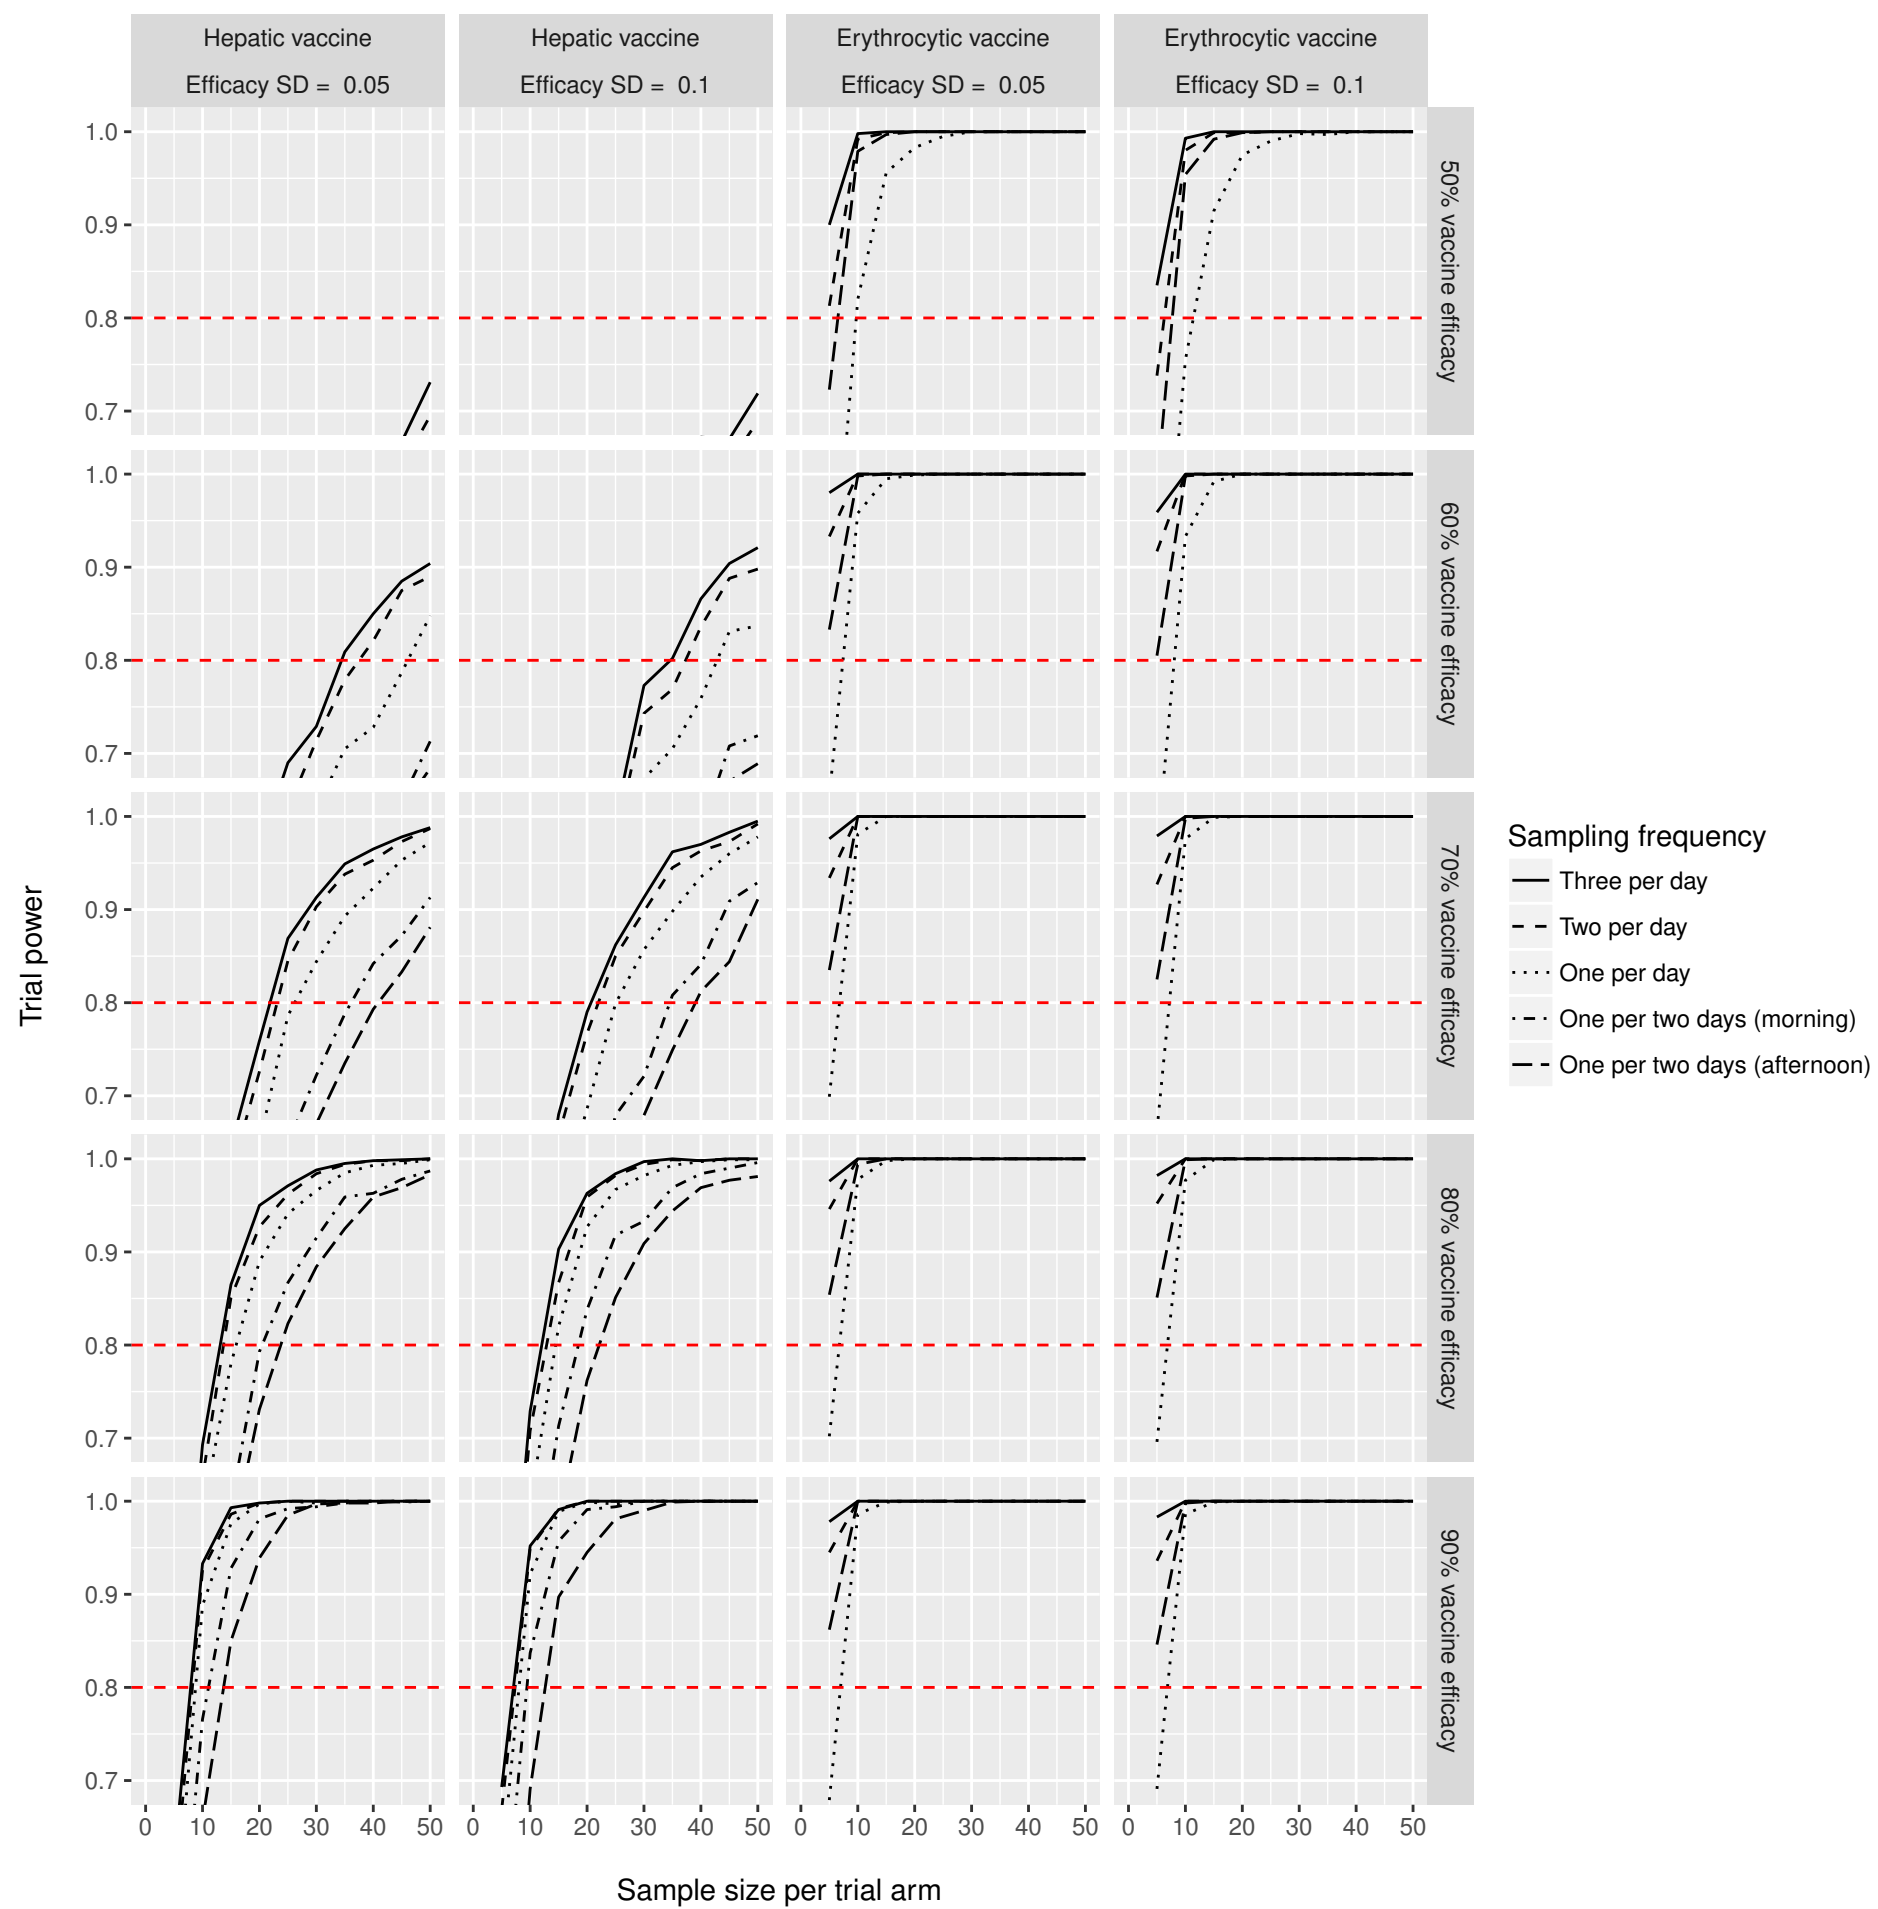

Supplement: pcbi.1005255.s007.pdf [file pcbi.1005255.s007.pdf]
